# Supplementary material for: Surface tension gradient invoked path selection
Source: Royal Society of Chemistry journal article supplement (doi:10.1039/d4cp01832j), 2024-01-01
Supplement: d4cp01832j16.pdf [file d4cp01832j16.pdf]

### §-I. RELATED VIDEOS

#### 1. Related to Figure 2

- Movie 1 : *L-shaped* channel: An experimental trace (blue) of a camphor infused disc (yellow) moving along the *L1* path.
- Movie 2 : *L-shaped* channel: An experimental trace (blue) of a camphor infused disc (yellow) moving along the *L2* path.
- Movie 3 : *L-shaped* channel: An experimental trace (blue) of a 1-pentanol infused disc (yellow) moving along the *L1* path.
- Movie 4 : *L-shaped* channel: An experimental trace (blue) of a 1-pentanol infused disc (yellow) moving along the *L2* path.

#### 2. Related to Figure 3

- Movie 5 : *Y-shaped* channel: An experimental trace (blue) of camphor infused disc (yellow) moving along the *L1* path.
- Movie 6 : *Y-shaped* channel: An experimental trace (blue) of a camphor infused disc (yellow) moving along the *L2* path.
- Movie 7 : *Y-shaped* channel: An experimental trace (blue) of a camphor infused disc (yellow) moving along the *L3* path.
- Movie 8 : *Y-shaped* channel: An experimental trace (blue) of a 1-pentanol infused disc (yellow) moving along the *L1* path.

- Movie 9 : *Y-shaped* channel: An experimental trace (blue) of a 1-pentanol infused disc (yellow) moving along the *L2* path.
- Movie 10 : *Y-shaped* channel: An experimental trace (blue) of a 1-pentanol infused disc (yellow) moving along the *L3* path.

#### 3. Related to Figure 5

- Movie 11 : *L-shaped* channel: A simulated trajectory (green) of a point-like particle (red) moving along the *L1* path.
- Movie 12 : *L-shaped* channel: A simulated trajectory (green) of a point-like particle (red) moving along the *L2* path.
- Movie 13 : *Y-shaped* channel: A simulated trajectory (green) of a point-like particle (red) moving along the *L1* path.
- Movie 14 : *Y-shaped* channel: A simulated trajectory (green) of a point-like particle (red) moving along the *L2* path.
- Movie 15 : *Y-shaped* channel: A simulated trajectory (green) of a point-like particle (red) moving along the *L3* path.
